# Supplementary material for: Identification of ISMyo2, a novel insertion sequence element of IS21 family and its diagnostic potential for detection of Mycobacterium yongonense
Source: PubMed Central journal article supplement (PMC4608216; doi:10.1186/s12864-015-1978-2), 2015-10-15

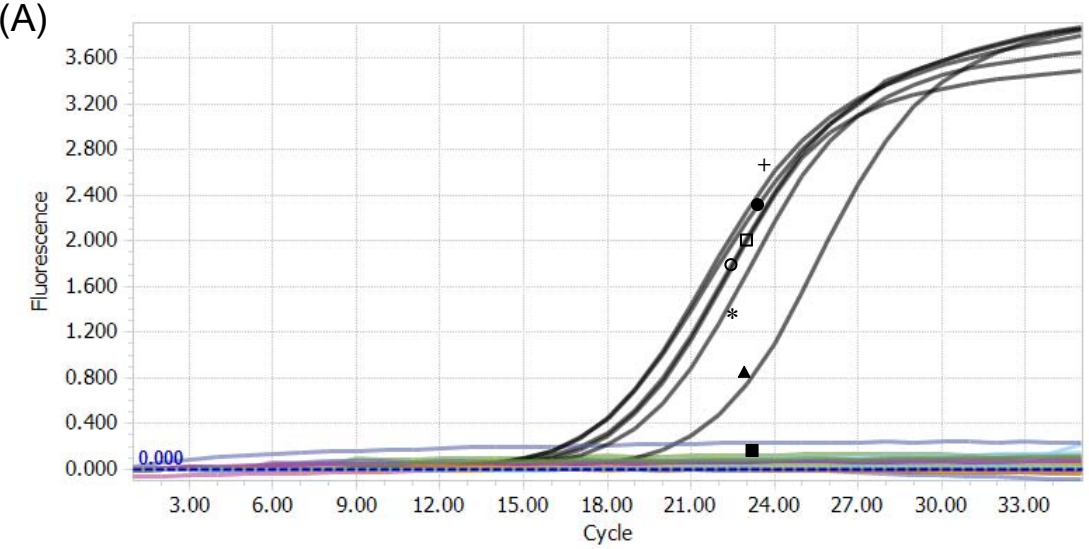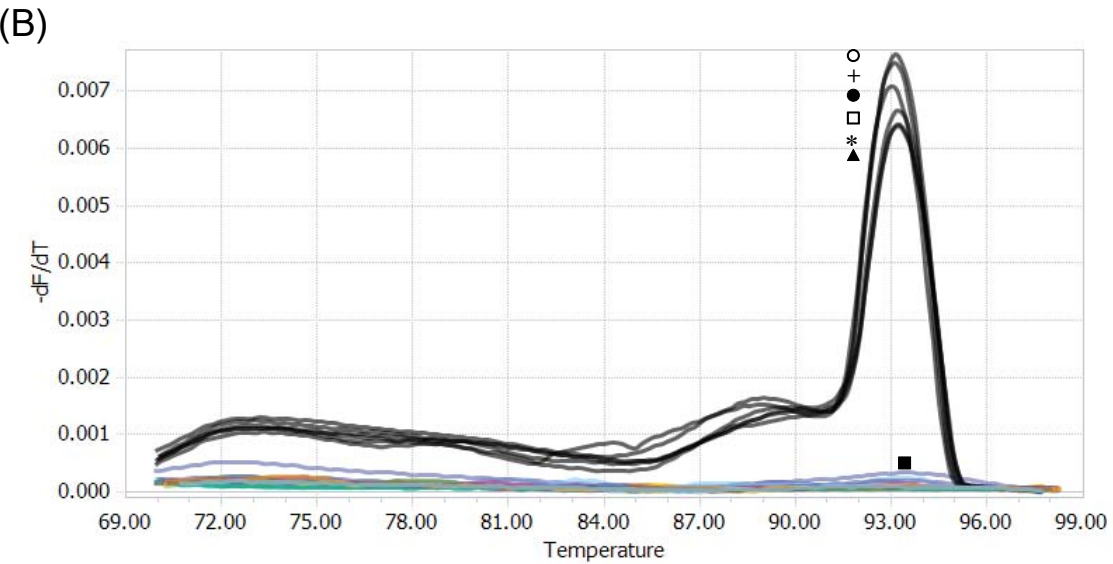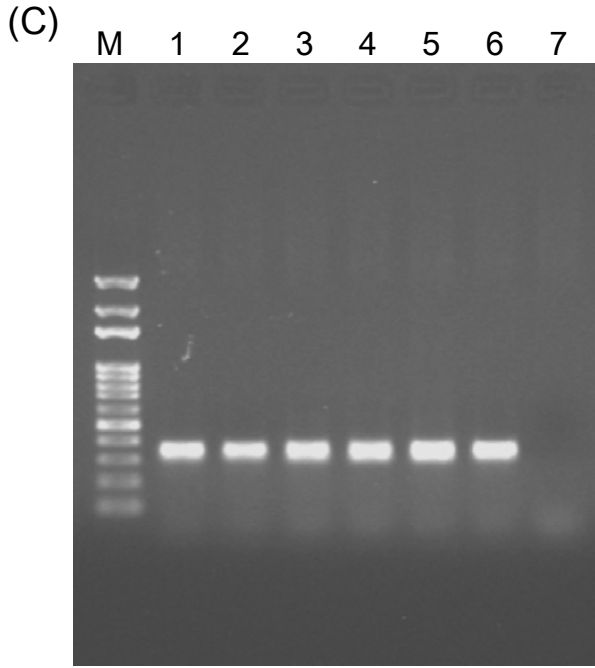

Supplement: 12864_2015_1978_MOESM7_ESM.pdf [file 12864_2015_1978_MOESM7_ESM.pdf]
